# Supplementary material for: Social Determinants of Stroke Hospitalization and Mortality in United States’ Counties
Source: J Clin Med. 2022 Jul 15;11(14):4101. doi: 10.3390/jcm11144101 (PMC9320068; doi:10.3390/jcm11144101)

## Supplementary Materials

### **Social Determinants of Stroke Hospitalization and Mortality in United States' Counties**

#### **Table of Content**

1. **Table S1.** Studies showing associations of socioeconomic variables with stroke incidence and outcomes in the United States.
2. **Table S2.** Name, definitions, and data sources of variables used in the study.
3. **Table S3.** Modeling Log standardized hospitalization ratio weighted by expected counts for each county.
4. **Table S4.** Modeling Log standardized mortality ratio weighted by expected counts for each county.
5. **Figure S1.** Correlation matrix and heatmap of predictor variables used in the study.
6. **Figure S2.** Map of US counties and county equivalents showing A. Prevalence of heart disease among Medicare beneficiaries, B. Blood pressure medication non-adherence, C. Cost of care among Medicare beneficiaries with heart disease, D. Age-adjusted obesity, E. Presence of hospital with neurological services, F. Presence of hospital.

**Table S1. Studies showing association of socioeconomic factors with stroke incidence and outcomes in the United States.**

| <b>Author</b>                   | <b>Objective/Purpose</b><br>(to evaluate)                                                     | <b>Methods/Design</b>                                                                                       | <b>Study Population</b>                                                                                                                             | <b>Variables studied</b>                                                                                                                                               | <b>Results/Findings</b>                                                                                                                               |
|---------------------------------|-----------------------------------------------------------------------------------------------|-------------------------------------------------------------------------------------------------------------|-----------------------------------------------------------------------------------------------------------------------------------------------------|------------------------------------------------------------------------------------------------------------------------------------------------------------------------|-------------------------------------------------------------------------------------------------------------------------------------------------------|
| (Avendano et al. 2006) [3]      | SES on stroke incidence in the elderly                                                        | Aged $\geq 65$ years, followed for 12 years. Proportional hazard models were applied.                       | $\geq 65$ years from the New Haven cohort of EPESE                                                                                                  | Education, income, Hypertension, Smoking, Diabetes, Body mass index, Physical activity, Alcohol consumption, Physical/Cognitive Functioning, Psychosocial Risk Factors | N= 2812. At ages 65 to 74, LSES: education (HR: 2.07; 95% CI: 1.04-4.13), income (HR: 2.08; 95% CI: 1.01-4.27). Cross over association in $>75$ year. |
| (Avendano and Glymour 2008) [4] | Independent effect of wealth, income, and education on stroke incidence in middle and old age | Stroke-free participants were followed 8.5 years. Cox proportional hazard models to predict time to stroke. | Health and Retirement Study (HRS)- national sample of US adults aged $\geq 50$ and their spouses                                                    | Household wealth, household income, and education, smoking status, body mass index (BMI), vigorous physical activity, hypertension, diabetes, and heart disease        | N= 19,565. Wealth and income were independent risk factors for stroke at ages 50-64 but not in $\geq 65$ years.                                       |
| (Bettger et al. 2014) [5]       | Education, work, and income with disability 3-months following acute ischemic stroke.         | Retrospective analyses of a prospective cohort. Multivariable logistic regression was                       | $\geq 18$ years hospitalized at a GWTG-Stroke participating hospital with a primary diagnosis of transient ischemic attack or ischemic stroke based | education, income and employment                                                                                                                                       | In survivors, after adjusting; unemployed, not-working, retired, less educated, or inadequate income prior to stroke had a significantly higher       |

|                            |                                                                                                                      | applied.                                                                                                                                                      | on ICD-9                                                                                                                                                                                                                               |                                                                                                           | odds of post-stroke disability.                                                                                                                                                                                                                                                           |
|----------------------------|----------------------------------------------------------------------------------------------------------------------|---------------------------------------------------------------------------------------------------------------------------------------------------------------|----------------------------------------------------------------------------------------------------------------------------------------------------------------------------------------------------------------------------------------|-----------------------------------------------------------------------------------------------------------|-------------------------------------------------------------------------------------------------------------------------------------------------------------------------------------------------------------------------------------------------------------------------------------------|
| (Hanchate et al. 2013) [6] | Inpatient mortality and length of stay by race/ethnicity and SES in eight US states                                  | Population was stratified by race/ethnicity (non-Hispanic whites, non-Hispanic blacks, and Hispanics) and SES, measured by median income of patient zip code. | Acute ischemic stroke admissions for adults $\geq 18$ years; state-level inpatient discharge databases from all nonfederal acute care hospitals in Arizona, California, Florida, Maine, New Jersey, New York, Pennsylvania, and Texas. | race/ethnicity, socioeconomic status, measured by median income of patient zip code, patient risk factors | Adjusted inpatient mortality was similar by race/ethnicity, but was significantly higher for low-income area (OR: 1.08; 95%CI: 1.02-1.15). Risk-adjusted longer length of stay higher in minority and low-income area.                                                                    |
| (Howard et al. 2016) [7]   | Neighborhood socioeconomic characteristics and incident stroke in a national cohort of black and white participants. | National population-based cohort was done.                                                                                                                    | $\geq 45$ years, enrolled in 2003–2007 in Reasons for Geographic and Racial Differences in Stroke (REGARDS)                                                                                                                            | Neighborhood SES (nSES), Educational level, Annual household income, Framingham stroke risk factors       | After adjustment; stroke incidence increased with each decreasing nSES quartile. HR; Q3=1.28 (95%CI: 1.05–1.56), Q2=1.38 (95%CI: 1.13–1.68), Q1=1.56 (95%CI: 1.26–1.92) (p=0.0001). Marginally significant for individual SES; attenuated the association between nSES and stroke in both |

|                                      |                                                                                                                           |                                                                                                                                          |                                                                                                                                               |                                                                                                                                                                                                                                                             |                                                                                                                                                                                                                                                    |
|--------------------------------------|---------------------------------------------------------------------------------------------------------------------------|------------------------------------------------------------------------------------------------------------------------------------------|-----------------------------------------------------------------------------------------------------------------------------------------------|-------------------------------------------------------------------------------------------------------------------------------------------------------------------------------------------------------------------------------------------------------------|----------------------------------------------------------------------------------------------------------------------------------------------------------------------------------------------------------------------------------------------------|
|                                      |                                                                                                                           |                                                                                                                                          |                                                                                                                                               |                                                                                                                                                                                                                                                             | black and white participants, greater in blacks                                                                                                                                                                                                    |
| (Pedigo, Aldrich, and Odoi 2011) [8] | Spatial patterns of stroke and MI mortality risks in the East Tennessee to identify neighborhoods with the highest risks. | Logistic models were used to investigate neighborhood level socioeconomic and demographic predictors of the identified spatial clusters. | 11 counties of the East Tennessee Appalachian Region that have some of the highest risks of stroke and/or MI in the state-Census tracts (CTs) | black race, gender, age 65 years and older, household income, education less than high school, population below poverty, median housing value, geography (urban versus rural), employment, single parent families, marital status, and housing ownership,   | Neighborhoods belonging to high risk clusters of stroke and MI mortality tended to have high proportions of the population with low education attainment.                                                                                          |
| (Brown et al. 2011) [9]              | Neighborhood SES and incident ischemic stroke and potential mediators of these associations.                              | The Cardiovascular Health Study, a multicenter, population-based, longitudinal. Race-stratified multilevel Cox proportional hazard       | Whites and blacks enrolled in the Cardiovascular Health Study- $\geq 65$ years from 4 US counties.                                            | Neighborhood SES, age, sex, race, median household income, and education, smoking history, physical activity, alcohol use, and diet, cardiovascular disease, atrial fibrillation, hypertension, diabetes, and total cholesterol to high density lipoprotein | Adjusted: in whites, stroke hazard significantly higher in neighborhoods in lowest SES quartile (HR, 1.32; 95% CI, 1.01–1.72) with greater attenuation after adjustment for biological risk factors (HR, 1.16; 0.88–1.52) than for behavioral risk |

|                           |                                                                                                                                         |                                                                                                                                                                  |                                       |                                                                                                                                       |                                                                                                                                                                                                                                                                                                                                                       |
|---------------------------|-----------------------------------------------------------------------------------------------------------------------------------------|------------------------------------------------------------------------------------------------------------------------------------------------------------------|---------------------------------------|---------------------------------------------------------------------------------------------------------------------------------------|-------------------------------------------------------------------------------------------------------------------------------------------------------------------------------------------------------------------------------------------------------------------------------------------------------------------------------------------------------|
|                           |                                                                                                                                         |                                                                                                                                                                  |                                       | cholesterol ratio                                                                                                                     | factors (HR, 1.30; 0.99–1.70). No significant associations in blacks                                                                                                                                                                                                                                                                                  |
| (Schieb et al. 2013) [10] | Clustering of stroke hospitalization rates, patterns of the clustering over time, and associations with community-level characteristics | Medicare hospital claims data from 1995-1996 to 2005-2006 with a principal discharge diagnosis of stroke to calculate county-level stroke hospitalization rates. | Medicare beneficiaries aged $\geq 65$ | age, sex, and race or ethnicity, Median household income, poverty, without a high school diploma, Health care, Urban/rural, Migration | Persistently low-stroke hospitalization rates counties had the most favorable socioeconomic and healthcare profiles, followed by counties that transitioned out of or into high-stroke hospitalization rates clusters. Persistently high-stroke hospitalization rates counties experienced the least favorable socioeconomic and healthcare profiles. |

N: sample size; SES: Socioeconomic status; LSES: Low Socioeconomic status; HR: Hazard Ratio; RR: Relative Risk; OR: Odds Ratio; CI: Confidence Interval, Q: quartile.

**Table S2. Name, definitions, and data sources of variables used in the study.**

| <b>Variables</b>                     | <b>Definitions</b>                                                                                                                                                                                                                                                         | <b>Data Sources</b>                                                                                                                                                                                                                                                                                                                                                                |
|--------------------------------------|----------------------------------------------------------------------------------------------------------------------------------------------------------------------------------------------------------------------------------------------------------------------------|------------------------------------------------------------------------------------------------------------------------------------------------------------------------------------------------------------------------------------------------------------------------------------------------------------------------------------------------------------------------------------|
| Stroke Hospitalization Rate (SHR)    | All Stroke Hospitalization Rate per 1,000 Medicare Beneficiaries, 65+, All Races/Ethnicities, Both Genders, 2015-2017                                                                                                                                                      | Centers for Medicare and Medicaid Services Medicare Provider Analysis and Review (MEDPAR) file, Part A.<br><br><a href="http://www.cms.gov/Research-Statistics-Data-and-Systems/Statistics-Trends-and-Reports/MedicareFeeforSvcPartsAB/MEDPAR.html">http://www.cms.gov/Research-Statistics-Data-and-Systems/Statistics-Trends-and-Reports/MedicareFeeforSvcPartsAB/MEDPAR.html</a> |
| Stroke Death Rate (SDR)              | All Stroke Death Rate per 100,000, All Ages, All Races/Ethnicities, Both Genders, 2016-2018<br><br>All Stroke: I60-I69; underlying cause of death.<br>Ischemic Stroke: I63, I65-I66; underlying cause of death.<br>Hemorrhagic Stroke: I60-I62; underlying cause of death. | Deaths National Vital Statistics System. Bridged-Race Postcensal Population Estimates from National Center for Health Statistics.<br><a href="http://www.cdc.gov/nchs/deaths.htm">http://www.cdc.gov/nchs/deaths.htm</a><br><a href="http://www.cdc.gov/nchs/nvss/bridged_race.htm">http://www.cdc.gov/nchs/nvss/bridged_race.htm</a>                                              |
| Park access                          | Percentage of Population Living Within Half a Mile of a Park, 2015                                                                                                                                                                                                         | CDC Environmental Public Health Tracking Network<br>Original data sources: NAVTEQ and U.S. Census Bureau<br><a href="http://ephtracking.cdc.gov/showAccessToParksAndSchools.action">http://ephtracking.cdc.gov/showAccessToParksAndSchools.action</a>                                                                                                                              |
| Hospital present                     | Hospitals, 2017                                                                                                                                                                                                                                                            | Health Resources and Services Administration: Area Health Resources File<br><a href="https://datawarehouse.hrsa.gov/topics/ahrf.aspx">https://datawarehouse.hrsa.gov/topics/ahrf.aspx</a>                                                                                                                                                                                          |
| Hospitals with Neurological services | Hospitals with Neurological Services, 2017                                                                                                                                                                                                                                 | Health Resources and Services Administration: Area Health Resources File<br><a href="https://datawarehouse.hrsa.gov/topics/ahrf.aspx">https://datawarehouse.hrsa.gov/topics/ahrf.aspx</a>                                                                                                                                                                                          |
| Age-adjusted obesity                 | Obesity, Age-Adjusted Percentage, 20+. 2016                                                                                                                                                                                                                                | CDC Division of Diabetes Translation: CDC Behavioral Risk Factor Surveillance System, U.S. Census Bureau Population Estimates                                                                                                                                                                                                                                                      |

|                                  |                                                                                  |                                                                                                                                                                                                                                          |
|----------------------------------|----------------------------------------------------------------------------------|------------------------------------------------------------------------------------------------------------------------------------------------------------------------------------------------------------------------------------------|
|                                  |                                                                                  | <a href="http://www.cdc.gov/diabetes/data/county.html">http://www.cdc.gov/diabetes/data/county.html</a>                                                                                                                                  |
| Without college                  | Percentage without 4+ Years College, Ages 25+, 2014-2018 (5-year)                | U.S. Census Bureau (ACS): American Community Survey, (5-year estimate)<br><a href="http://factfinder2.census.gov/">http://factfinder2.census.gov/</a>                                                                                    |
| Age-adjusted diabetes            | Diagnosed Diabetes, Age-Adjusted Percentage, 20+, 2016                           | CDC Division of Diabetes Translation: CDC Behavioral Risk Factor Surveillance System, U.S. Census Bureau Population Estimates<br><a href="http://www.cdc.gov/diabetes/data/county.html">http://www.cdc.gov/diabetes/data/county.html</a> |
| Age-adjusted physical Inactivity | Leisure-Time Physical Inactivity, Age Adjusted Percentage, 20+, 2016             | CDC Division of Diabetes Translation: CDC Behavioral Risk Factor Surveillance System, U.S. Census Bureau Population Estimates<br><a href="http://www.cdc.gov/diabetes/data/county.html">http://www.cdc.gov/diabetes/data/county.html</a> |
| Income inequality                | Income Inequality (Gini Index), 2014-2018 (5-year)                               | U.S. Census Bureau (ACS): American Community Survey, (5-year estimate)<br><a href="http://factfinder2.census.gov/">http://factfinder2.census.gov/</a>                                                                                    |
| Unemployment                     | Unemployment Rate, Ages 16+, 2018                                                | U.S. Bureau of Labor Statistics: Local Area Unemployment Statistics<br><a href="http://www.bls.gov/">http://www.bls.gov/</a>                                                                                                             |
| Female head of household         | Families with Female Head of Household (%), 2014-2018 (5-year)                   | U.S. Census Bureau (ACS): American Community Survey, (5-year estimate)<br><a href="http://factfinder2.census.gov/">http://factfinder2.census.gov/</a>                                                                                    |
| Food assistance                  | Percentage Food Stamp/Supplemental Nutrition Assistance Program Recipients, 2016 | Health Resources and Services Administration: Area Health Resources File<br><a href="https://datawarehouse.hrsa.gov/topics/ahrf.aspx">https://datawarehouse.hrsa.gov/topics/ahrf.aspx</a>                                                |
| Household income                 | Median Household Income (in thousands of \$), 2018                               | U.S. Census Bureau (SAIPE): Small Area Income and Policy Estimates<br><a href="https://www.census.gov/programs-surveys/saipe.html">https://www.census.gov/programs-surveys/saipe.html</a>                                                |
| Poverty                          | Percentage Living in Poverty, All Ages, 2018                                     | U.S. Census Bureau (SAIPE): Small Area Income and Policy Estimates<br><a href="https://www.census.gov/programs-surveys/saipe.html">https://www.census.gov/programs-surveys/saipe.html</a>                                                |
| Cost of care                     | Cost of Care per Capita for Medicare                                             | Centers for Medicare and Medicaid Services' (CMS) Chronic                                                                                                                                                                                |

|                                        |                                                                                                                                                                                                                                                                                                                                                                                                                                        |                                                                                                                                                                                                            |
|----------------------------------------|----------------------------------------------------------------------------------------------------------------------------------------------------------------------------------------------------------------------------------------------------------------------------------------------------------------------------------------------------------------------------------------------------------------------------------------|------------------------------------------------------------------------------------------------------------------------------------------------------------------------------------------------------------|
|                                        | Beneficiaries Diagnosed with Heart Disease, Outpatient, 2017                                                                                                                                                                                                                                                                                                                                                                           | Conditions Data Warehouse<br>( <a href="https://www.cdc.gov/dhdsp/maps/atlas/maps-of-cost-data.html">https://www.cdc.gov/dhdsp/maps/atlas/maps-of-cost-data.html</a> )                                     |
| Heart disease                          | Prevalence of Diagnosed Heart Disease Among Medicare Beneficiaries, 2017                                                                                                                                                                                                                                                                                                                                                               | Centers for Medicare & Medicaid Services: Chronic Conditions Data Warehouse<br><a href="https://www.ccwdata.org/">https://www.ccwdata.org/</a>                                                             |
| Blood pressure medication nonadherence | <p>Blood Pressure Medication Nonadherence Percentage, All Races/Ethnicities, Medicare Part D Beneficiaries Aged 65+, 2017</p> <p>Medication Nonadherence, defined as a proportion of days a beneficiary was covered with medication of &lt;80%, was assessed using prescription drug claims data among Medicare Advantage or Medicare fee-for-service beneficiaries aged <math>\geq 65</math> years with Medicare Part D coverage.</p> | Medicare Part D Claims Data: Centers for Medicare & Medicaid Services, CDC Vital Signs Report<br><a href="https://www.cdc.gov/vitalsigns/blood-pressure">https://www.cdc.gov/vitalsigns/blood-pressure</a> |

**Table S3. Modeling Log standardized hospitalization ratio weighted by expected counts for each county.**

| <b>Variable</b>                                         | <b>Estimate (95% CI)</b> | <b><i>p-value</i></b> |
|---------------------------------------------------------|--------------------------|-----------------------|
| Prevalence of heart disease among Medicare patients     | 0.06 (0.04 - 0.07)       | <0.001                |
| Food assistance                                         | 0.005 (-0.01 - 0.02)     | 0.52                  |
| Age-adjusted obesity                                    | 0.005 (0 - 0.02)         | 0.331                 |
| Female head of household                                | 0.03 (0.01 - 0.05)       | <0.001                |
| Blood pressure medication nonadherence                  | 0.03 (0 - 0.05)          | 0.014                 |
| Age-adjusted physical inactivity                        | 0.01 (0 - 0.02)          | 0.099                 |
| Cost of care among Medicare patients with heart disease | -0.08 (-0.09 - -0.07)    | <0.001                |
| Age-adjusted diabetes                                   | 0.01 (0 - 0.02)          | 0.095                 |
| No college degree                                       | 0 .001 (-0.01 - 0.01)    | 0.964                 |
| Hospital present                                        | -0.02 (-0.04 - 0.01)     | 0.134                 |
| Park access                                             | -0.002 (-0.01 - 0.01)    | 0.736                 |
| Hospital with neurological services                     | 0.02 (0 - 0.04)          | 0.014                 |

**Table S4. Modeling Log standardized mortality ratio weighted by expected counts for each county.**

| <b>Variable</b>                     | <b>Estimate (95% CI)</b> | <b><i>p-value</i></b> |
|-------------------------------------|--------------------------|-----------------------|
| Age-adjusted physical inactivity    | 0.002 (-0.01 - 0.01)     | 0.598                 |
| Median household income             | -0.021 (-0.03 - -0.01)   | <0.001                |
| Unemployment                        | 0.01 (0 - 0.02)          | 0.211                 |
| Age-adjusted obesity                | 0.001 (-0.01 - 0.01)     | 0.9                   |
| No college degree                   | 0.02 (0.01 - 0.03)       | <0.001                |
| Female head of household            | 0.013 (0 - 0.03)         | 0.036                 |
| Age-adjusted diabetes               | 0.001 (-0.01 - 0.01)     | 0.972                 |
| Park access                         | 0.01 (0.01 - 0.02)       | 0.001                 |
| Hospital with neurological services | 0.002 (-0.01 - 0.01)     | 0.723                 |
| Income inequality (Gini Index)      | 0.003 (-0.01 - 0.01)     | 0.531                 |

**Figure S1. Correlation matrix and heatmap of predictor variables used in the study.**

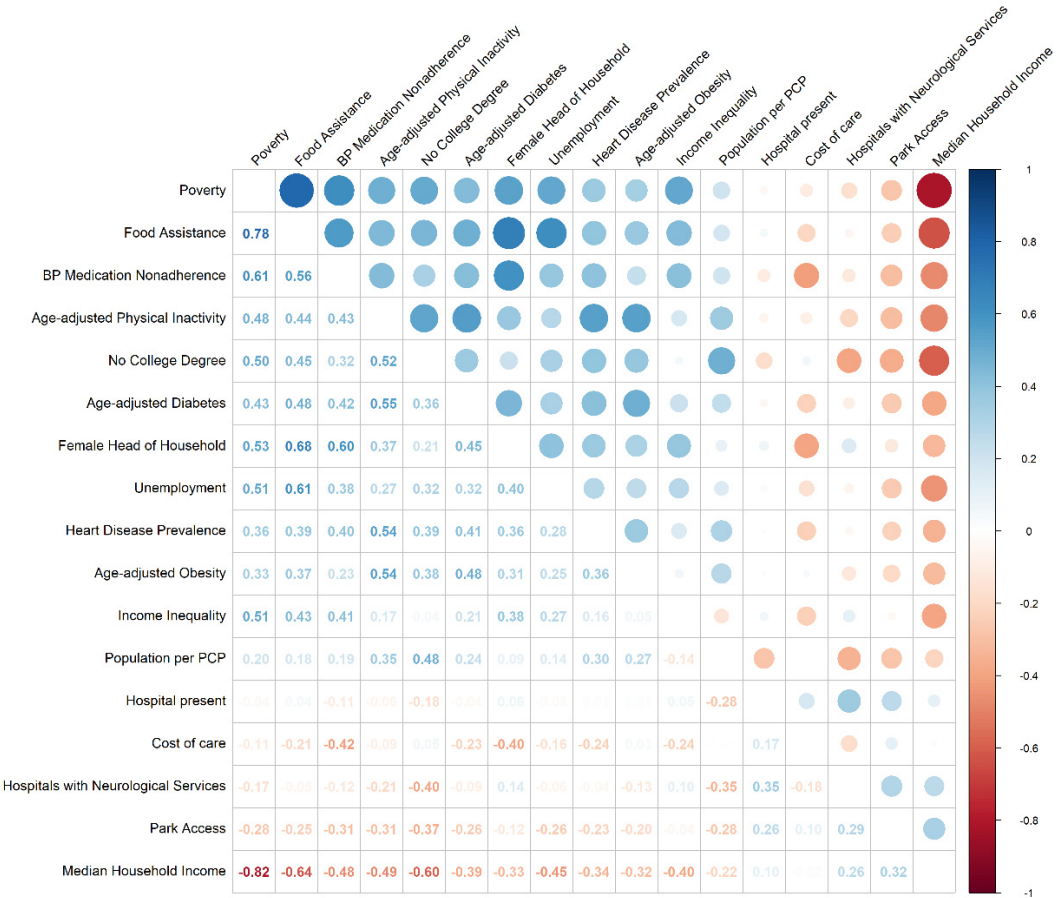

**Figure S2.** Map of US counties and county equivalents showing A. Prevalence of heart disease among Medicare beneficiaries, B. Blood pressure medication non-adherence, C. Cost of care among Medicare beneficiaries with heart disease, D. Age-adjusted obesity, E. Presence of hospital with neurological services, F. Presence of hospital.

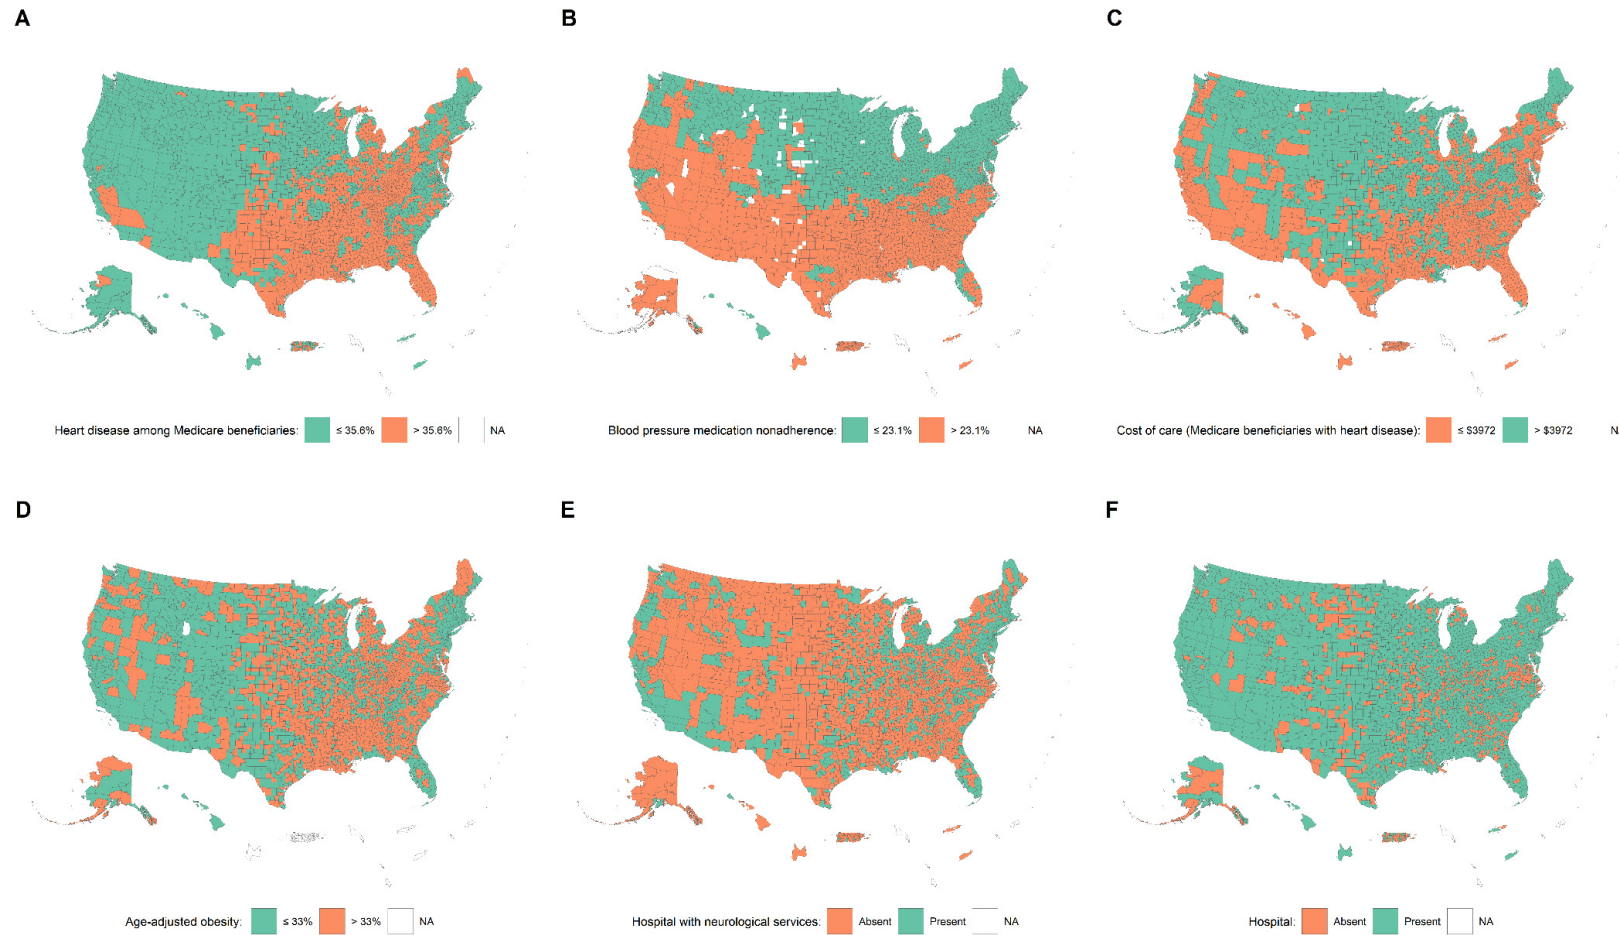

Supplement: Supplementary file 1 [file jcm-11-04101-s001.zip › jcm-1642615-supplementary.pdf]
